# Supplementary material
Source: Springer Nature journal article supplement (https://www.springermedizin.de/resource/supplementary/12881_2011_839_MOESM6_ESM.pdf/9451184)

a)  $-\log_{10}(\text{Observed P-value})$

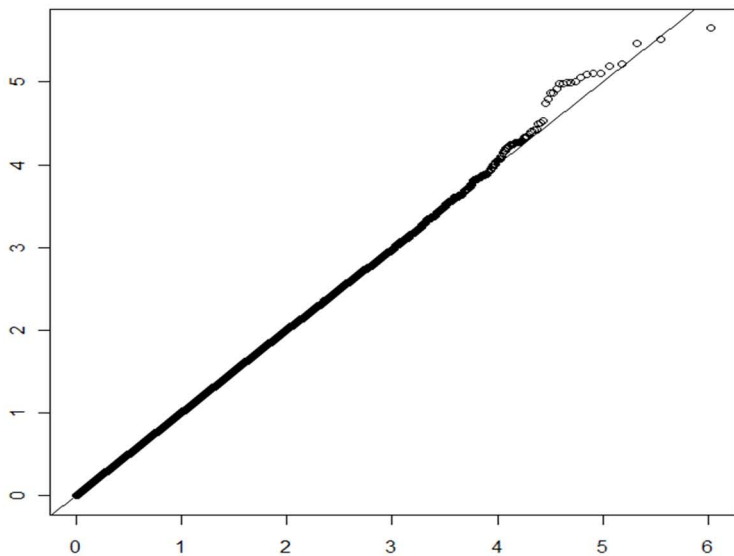

b)  $-\log_{10}(\text{Observed P-value})$

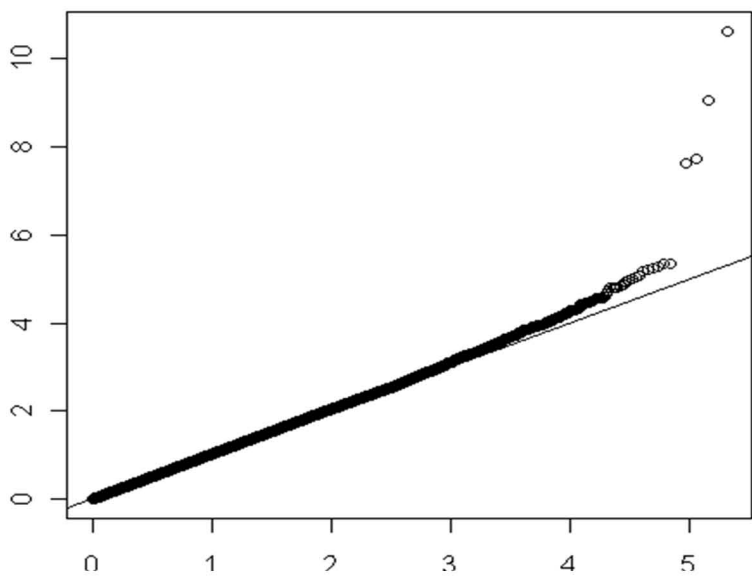

c)  $-\log_{10}(\text{Observed P-value})$

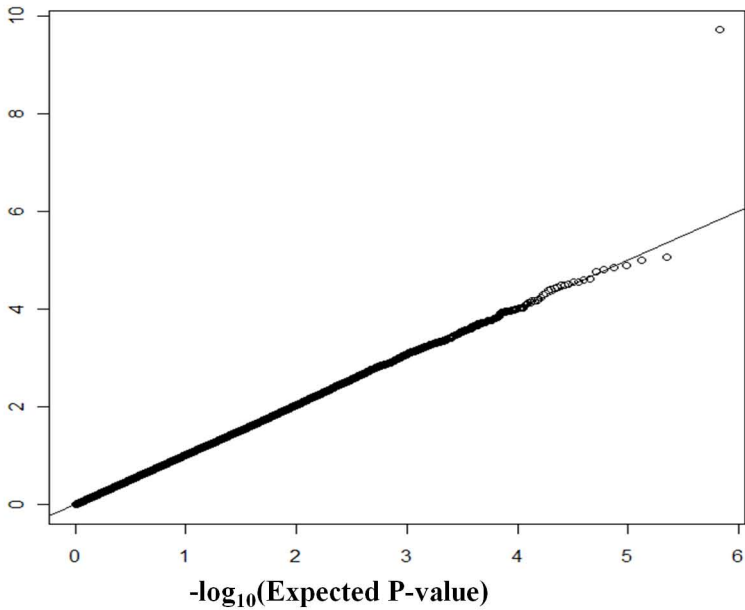

Supplement: MOESM6 [file 9451184]
